# Supplementary material
Source: PubMed Central journal article supplement (PMC4209990)
Supplement: pnas.201415475SI.pdf [file pnas.201415475SI.pdf]

# Supporting Information

Boucher et al. 10.1073/pnas.1415475111

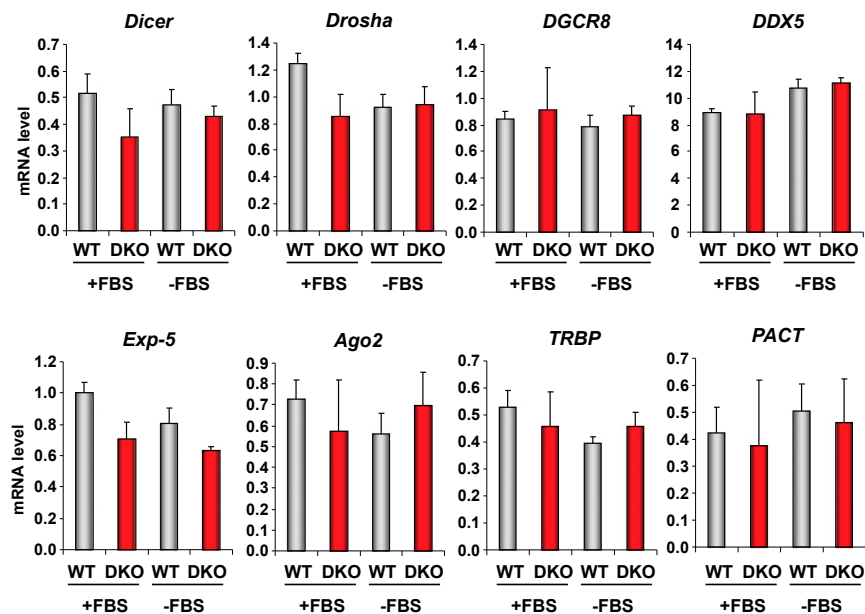

**Fig. S1.** Expression of proteins playing a role in microRNA (miRNA) formation or maturation. *Dicer*, *Drosha*, *DGCR8*, *Exp-5*, *Ago2*, *TRBP*, *PACT*, or *DDX5* mRNA levels were measured by real-time PCR in WT and double-knockout (DKO) cells in the presence (+FBS) or absence (–FBS) of serum for 6 h. Results represent the average  $\pm$  SEM of six independent experiments.

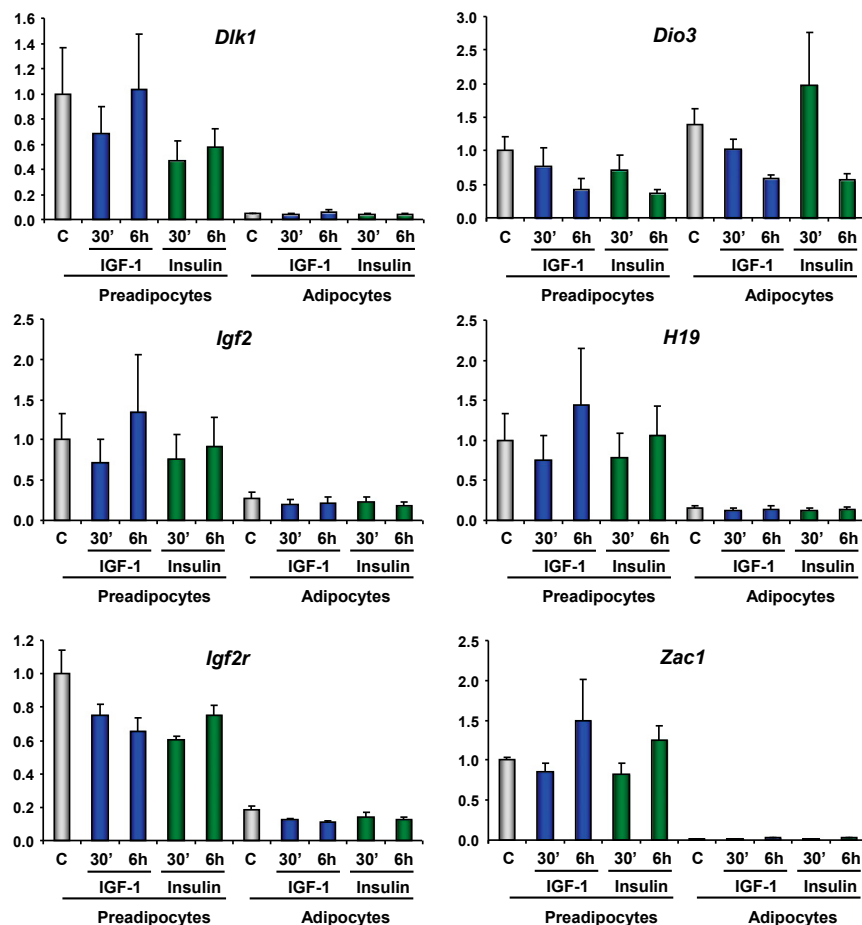

**Fig. S2.** Insulin and IGF1 gene regulation in nondifferentiated or differentiated brown preadipocytes. WT brown preadipocytes or differentiated adipocytes were serum-deprived for 1 h in DMEM plus 0.1% BSA and were treated with 1 nM insulin or IGF1 for 30 min or 6 h. Gene expression was measured by real-time PCR. Results represent the average  $\pm$  SEM of three independent experiments.

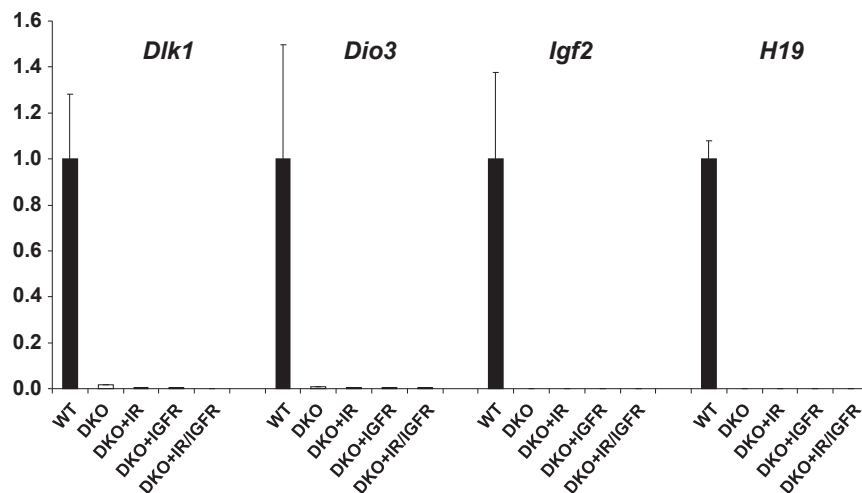

**Fig. S3.** Abundance of *Dlk1*, *Dio3*, *Igf2*, and *H19* mRNA was measured by real time PCR in WT, DKO, and DKO cells reexpressing hIR, hIGFR, or both, in the presence of serum. Results represent the average  $\pm$  SEM of three independent experiments.

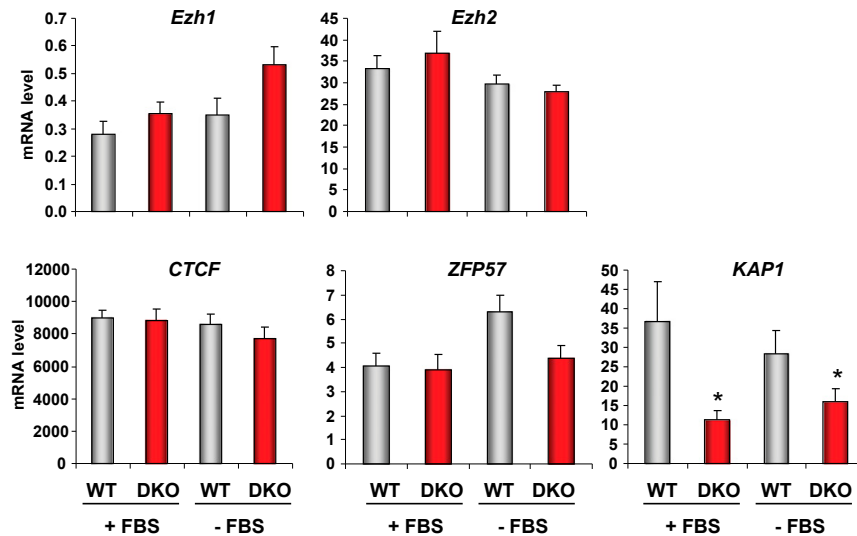

**Fig. S4.** mRNA levels in WT and DKO cells. mRNA levels of *Ezh1*, *Ezh2*, *CTCF*, *ZFP57*, and *KAP1* were measured by real-time PCR in WT and DKO cells in the presence (+FBS) or absence (–FBS) of serum for 6 h. Results represent the average  $\pm$  SEM of six independent experiments. \* $P < 0.05$  compared with WT cells.

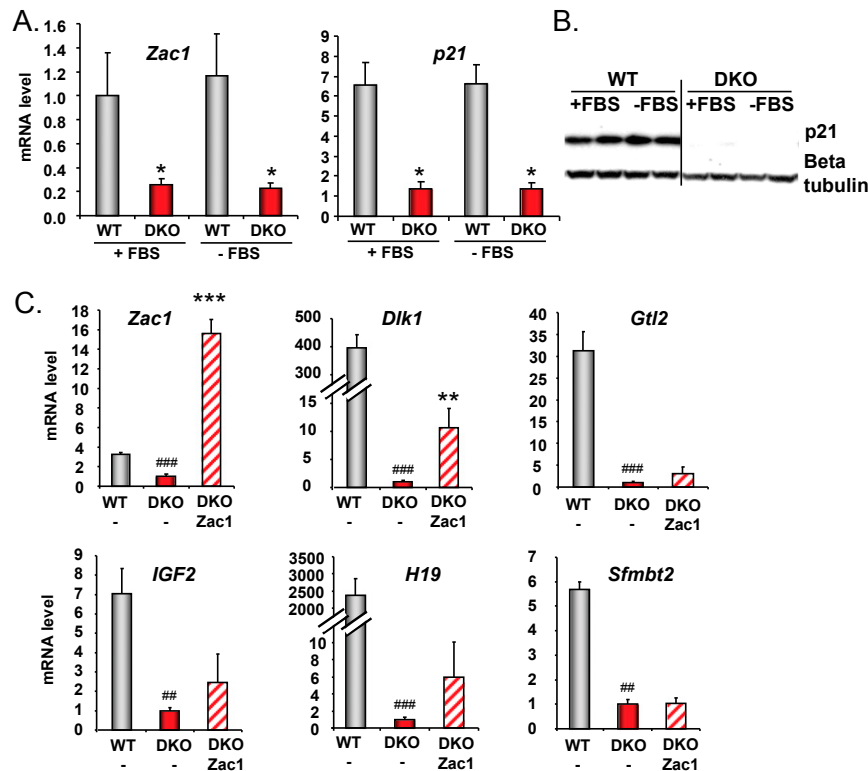

**Fig. S5.** Zac1 levels and overexpression in DKO cells. (A) mRNA levels of *Zac1* and *p21* were measured by real-time PCR in WT and DKO cells in the presence (+FBS) or absence (–FBS) of serum for 6 h. Results represent the average  $\pm$  SEM of six independent experiments. (B) *p21* and beta-tubulin protein levels were quantified in WT and DKO confluent cells maintained in the presence or absence of serum for 6 h. One representative Western blot from three independent experiments is shown. (C) Expression of imprinted genes in DKO cells stably overexpressing *Zac1* and WT and DKO cells stably expressing the empty control pBabe vector were measured by real-time PCR. Results represent the average  $\pm$  SEM of six independent experiments. \* $P < 0.05$ ; \*\* $P < 0.01$ ; \*\*\* $P < 0.001$  (compared with DKO cells expressing the control vector); # $P < 0.05$ ; ## $P < 0.01$ ; ### $P < 0.001$  (compared with WT cells expressing the control vector).



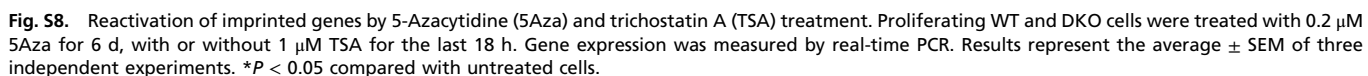

| Gene symbol | Average WT | SEM WT | Average DKO | SEM DKO | P value | Ratio DKO/WT |
|-------------|------------|--------|-------------|---------|---------|--------------|
| Zrsr1       | 1,167      | 138    | 1,993       | 64      | 0.002   | 1.71         |
| Kcnq1ot1    | 308        | 74     | 342         | 79      | 0.763   | 1.11         |
| Copg2       | 3,198      | 335    | 3,047       | 218     | 0.717   | 0.95         |
| Ube3a       | 6,232      | 1,416  | 5,720       | 755     | 0.760   | 0.92         |
| Comm1d1     | 15,331     | 2,259  | 13,145      | 2,153   | 0.504   | 0.86         |
| Sgce        | 7,766      | 1,015  | 6,579       | 952     | 0.419   | 0.85         |
| Mcts2       | 3,823      | 588    | 3,138       | 272     | 0.333   | 0.82         |
| Airn        | 439        | 77     | 351         | 51      | 0.370   | 0.80         |
| Tssc4       | 4,536      | 341    | 3,100       | 53      | 0.013   | 0.68         |
| Dhcr7       | 2,817      | 401    | 1,836       | 222     | 0.074   | 0.65         |
| H13         | 8,945      | 1,687  | 5,786       | 360     | 0.135   | 0.65         |
| Blcap       | 2,767      | 384    | 1,663       | 143     | 0.042   | 0.60         |
| Cd81        | 32,596     | 3,552  | 19,236      | 1,410   | 0.016   | 0.59         |
| Osbpl5      | 2,276      | 407    | 1,185       | 115     | 0.053   | 0.52         |
| Grb10       | 303        | 59     | 149         | 19      | 0.059   | 0.49         |
| Ddc         | 380        | 110    | 150         | 40      | 0.105   | 0.39         |
| Plagl1      | 14,886     | 4,910  | 5,560       | 1,362   | 0.132   | 0.37         |
| Igf2r       | 2,018      | 549    | 592         | 140     | 0.059   | 0.29         |
| Slc38a4     | 5,675      | 608    | 1,218       | 253     | 0.001   | 0.21         |
| Nnat        | 421        | 157    | 64          | 15      | 0.086   | 0.15         |
| Tfpi2       | 561        | 169    | 41          | 21      | 0.037   | 0.07         |
| Mirg        | 1,012      | 259    | 70          | 18      | 0.022   | 0.07         |
| Mest        | 10,179     | 3,292  | 680         | 193     | 0.045   | 0.07         |
| Ndn         | 2,460      | 1,135  | 61          | 27      | 0.102   | 0.02         |
| Igf2        | 5,163      | 3,799  | 84          | 32      | 0.252   | 0.02         |
| Cdkn1c      | 4,444      | 2,089  | 31          | 12      | 0.102   | 0.01         |
| Dlk1        | 25,160     | 8,707  | 136         | 16      | 0.045   | 0.01         |
| H19         | 65,694     | 16,620 | 162         | 18      | 0.017   | 0.00         |

Averages of Affymetrix values for imprinted genes expressed either in WT or DKO cells are listed (all genes for which expression value were <300 have been eliminated. For genes with two or more probe sets, only the probe set with the highest Affymetrix value was kept).  $n = 5$  per group.
